# Supplementary material for: Are depression and poor sexual health neglected comorbidities? Evidence from a population sample
Source: PubMed Central journal article supplement (PMC4809090; doi:10.1136/bmjopen-2015-010521), 2016-03-23
Supplement: bmjopen-2015-010521supp.pdf [file bmjopen-2015-010521supp.pdf]

**Appendix 1: Sexual behaviour and STI risk of those reporting depressive symptoms, by gender**

|                                                                                                | Men                                         |                                         | Women                                       |                                         |
|------------------------------------------------------------------------------------------------|---------------------------------------------|-----------------------------------------|---------------------------------------------|-----------------------------------------|
|                                                                                                | Not treated and without depressive symptoms | Depressive symptoms (without treatment) | Not treated and without depressive symptoms | Depressive symptoms (without treatment) |
| Unweighted, weighted denominator                                                               | 4809, 5981                                  | 405, 455                                | 6413, 5718                                  | 549, 449                                |
| 2+ heterosexual/same-sex occasions of sexual intercourse, past 4 weeks <sup>1</sup>            |                                             |                                         |                                             |                                         |
| %                                                                                              | 68.7%                                       | 57.7%                                   | 66.1%                                       | 52.9%                                   |
| OR (95% CI)                                                                                    | 1.00                                        | <b>0.62 (0.47 - 0.82)</b>               | 1.00                                        | <b>0.58 (0.45 - 0.74)</b>               |
| aAOR (95% CI)                                                                                  | 1.00                                        | <b>0.58 (0.44 - 0.77)</b>               | 1.00                                        | <b>0.50 (0.39 - 0.64)</b>               |
| 2+ heterosexual partners, past year                                                            |                                             |                                         |                                             |                                         |
| %                                                                                              | 15.1%                                       | 21.6%                                   | 8.7%                                        | 13.0%                                   |
| OR (95% CI)                                                                                    | 1.00                                        | <b>1.55 (1.18 - 2.05)</b>               | 1.00                                        | <b>1.57 (1.22 - 2.01)</b>               |
| aAOR (95% CI)                                                                                  | 1.00                                        | <b>1.45 (1.06 - 1.97)</b>               | 1.00                                        | 1.28 (0.99 - 1.67)                      |
| Same-sex partner, past 5 years                                                                 |                                             |                                         |                                             |                                         |
| %                                                                                              | 2.5%                                        | 2.6%                                    | 2.8%                                        | 3.6%                                    |
| OR (95% CI)                                                                                    | 1.00                                        | 1.01 (0.52 - 1.94)                      | 1.00                                        | 1.29 (0.82 - 2.04)                      |
| aAOR (95% CI)                                                                                  | 1.00                                        | 0.97 (0.50 - 1.87)                      | 1.00                                        | 1.13 (0.71 - 1.80)                      |
| 2+ heterosexual/ same-sex partners without using a condom, past year                           |                                             |                                         |                                             |                                         |
| %                                                                                              | 7.4%                                        | 10.2%                                   | 4.4%                                        | 6.9%                                    |
| OR (95% CI)                                                                                    | 1.00                                        | <b>1.41 (1.01 - 1.98)</b>               | 1.00                                        | <b>1.63 (1.18 - 2.26)</b>               |
| aAOR (95% CI)                                                                                  | 1.00                                        | 1.29 (0.92 - 1.81)                      | 1.00                                        | 1.32 (0.95 - 1.83)                      |
| Paid for heterosexual/ same-sex, past year                                                     |                                             |                                         |                                             |                                         |
| %                                                                                              | 1.1%                                        | 1.5%                                    | 0.1%                                        | 0.1%                                    |
| OR (95% CI)                                                                                    | 1.00                                        | 1.38 (0.59 - 3.24)                      |                                             |                                         |
| aAOR (95% CI)                                                                                  | 1.00                                        | 1.38 (0.58 - 3.25)                      |                                             |                                         |
| Concurrent partnerships, past 5 years                                                          |                                             |                                         |                                             |                                         |
| %                                                                                              | 15.0%                                       | 20.7%                                   | 7.1%                                        | 8.8%                                    |
| OR (95% CI)                                                                                    | 1.00                                        | <b>1.48 (1.11 - 1.97)</b>               | 1.00                                        | <b>1.27 (0.92 - 1.74)</b>               |
| aAOR (95% CI)                                                                                  | 1.00                                        | <b>1.39 (1.03 - 1.89)</b>               | 1.00                                        | <b>1.05 (0.76 - 1.45)</b>               |
| Know/ perceive their most recent partner had sex with somebody else, past 5 years <sup>2</sup> |                                             |                                         |                                             |                                         |
| %                                                                                              | 22.8%                                       | 29.3%                                   | 22.2%                                       | 32.5%                                   |
| OR (95% CI)                                                                                    | 1.00                                        | <b>1.40 (1.06 - 1.86)</b>               | 1.00                                        | <b>1.69 (1.30 - 2.18)</b>               |
| aAOR (95% CI)                                                                                  | 1.00                                        | <b>1.37 (1.04 - 1.82)</b>               | 1.00                                        | <b>1.65 (1.27 - 2.14)</b>               |
| Diagnosed with a STI, past year                                                                |                                             |                                         |                                             |                                         |
| %                                                                                              | 0.9%                                        | 1.2%                                    | 0.8%                                        | 1.5%                                    |
| OR (95% CI)                                                                                    | 1.00                                        | 1.44 (0.64 - 3.23)                      | 1.00                                        | 1.96 (0.88 - 4.35)                      |
| aAOR (95% CI)                                                                                  | 1.00                                        | 1.21 (0.54 - 2.70)                      | 1.00                                        | 1.37 (0.58 - 3.22)                      |
| Self-perceived risk of STI: Quite a lot or greater                                             |                                             |                                         |                                             |                                         |
| %                                                                                              | 3.4%                                        | 7.4%                                    | 2.1%                                        | 4.4%                                    |
| OR (95% CI)                                                                                    | 1.00                                        | <b>2.24 (1.52 - 3.31)</b>               | 1.00                                        | <b>2.16 (1.36 - 3.42)</b>               |
| aAOR (95% CI)                                                                                  | 1.00                                        | <b>2.09 (1.41 - 3.09)</b>               | 1.00                                        | <b>1.91 (1.21 - 3.02)</b>               |

All participants who have had at least one opposite-sex or same-sex partner, ever (denominators may vary across variables due to item non-response)

aAOR: Age-adjusted odds ratio

<sup>1</sup> Denominator restricted to those reporting at least one heterosexual or same-sex partner in the last year (Men: Not treated and without depressive symptoms - 4809,5981; Depressive symptoms (without treatment) - 405, 455 | Women: Not treated and without depressive symptoms - 6413, 5718; Depressive symptoms (without treatment) - 549, 449)

<sup>2</sup> Denominator restricted to those reporting a sexual partnership in the past 5 years (Men: Not treated and without depressive symptoms - 3955, 3912; Depressive symptoms (without treatment) - 317, 256 | Women: Not treated and without depressive symptoms - 5273, 3657; Depressive symptoms (without treatment) - 438, 239)

**Appendix 2: Sexual function of those reporting depressive symptoms, by gender**

|                                                                                          | <b>Men</b>                                  |                                         | <b>Women</b>                                |                                         |
|------------------------------------------------------------------------------------------|---------------------------------------------|-----------------------------------------|---------------------------------------------|-----------------------------------------|
|                                                                                          | Not treated and without depressive symptoms | Depressive symptoms (without treatment) | Not treated and without depressive symptoms | Depressive symptoms (without treatment) |
| Unweighted, weighted denominator                                                         | 4750, 5914                                  | 396, 442                                | 6334, 5650                                  | 540, 435                                |
| Lowest quintile of sexual function (ref)                                                 |                                             |                                         |                                             |                                         |
| %                                                                                        | 17.3%                                       | 41.1%                                   | 16.2%                                       | 38.1%                                   |
| OR (95% CI)                                                                              | 1.00                                        | <b>3.33 (2.51 - 4.41)</b>               | 1.00                                        | <b>3.17 (2.45 - 4.10)</b>               |
| aAOR (95% CI)                                                                            | 1.00                                        | <b>3.63 (2.73 - 4.84)</b>               | 1.00                                        | <b>3.49 (2.68 - 4.56)</b>               |
| -----                                                                                    |                                             |                                         |                                             |                                         |
| Components of the Natsal-SF score <sup>1</sup>                                           |                                             |                                         |                                             |                                         |
| (ref)                                                                                    |                                             |                                         |                                             |                                         |
| Have experienced problems for 3+ months, past year                                       |                                             |                                         |                                             |                                         |
| %                                                                                        | 39.3%                                       | 56.2%                                   | 46.7%                                       | 72.3%                                   |
| OR (95% CI)                                                                              | 1.00                                        | <b>1.99 (1.50 - 2.64)</b>               | 1.00                                        | <b>2.98 (2.30 - 3.87)</b>               |
| aAOR (95% CI)                                                                            | 1.00                                        | <b>2.09 (1.57 - 2.78)</b>               | 1.00                                        | <b>3.16 (2.43 - 4.12)</b>               |
| Lacked interest in having sex for 3+ months, past year                                   |                                             |                                         |                                             |                                         |
| %                                                                                        | 13.0%                                       | 27.8%                                   | 30.0%                                       | 52.8%                                   |
| OR (95% CI)                                                                              | 1.00                                        | <b>2.58 (1.88 - 3.54)</b>               | 1.00                                        | <b>2.61 (2.05 - 3.33)</b>               |
| aAOR (95% CI)                                                                            | 1.00                                        | <b>2.63 (1.92 - 3.62)</b>               | 1.00                                        | <b>2.77 (2.17 - 3.53)</b>               |
| No orgasm or took a long time to reach orgasm despite arousal for 3+ months, past year   |                                             |                                         |                                             |                                         |
| %                                                                                        | 8.2%                                        | 11.2%                                   | 14.2%                                       | 24.9%                                   |
| OR (95% CI)                                                                              | 1.00                                        | 1.42 (0.95 - 2.14)                      | 1.00                                        | <b>2.00 (1.52 - 2.64)</b>               |
| aAOR (95% CI)                                                                            | 1.00                                        | 1.43 (0.95 - 2.15)                      | 1.00                                        | <b>1.96 (1.49 - 2.59)</b>               |
| Trouble achieving/maintaining erections for 3+ months, past year                         |                                             |                                         |                                             |                                         |
| %                                                                                        | 12.2%                                       | 15.1%                                   |                                             |                                         |
| OR (95% CI)                                                                              | 1.00                                        | 1.29 (0.90 - 1.84)                      |                                             |                                         |
| aAOR (95% CI)                                                                            | 1.00                                        | <b>1.49 (1.03 - 2.17)</b>               |                                             |                                         |
| -----                                                                                    |                                             |                                         |                                             |                                         |
| Disagree/ disagree strongly to the statement: "I feel satisfied with my sex life"        |                                             |                                         |                                             |                                         |
| %                                                                                        | 15.1%                                       | 32.5%                                   | 11.2%                                       | 24.3%                                   |
| OR (95% CI)                                                                              | 1.00                                        | <b>2.71 (2.10 - 3.50)</b>               | 1.00                                        | <b>2.53 (1.98 - 3.23)</b>               |
| aAOR (95% CI)                                                                            | 1.00                                        | <b>2.77 (2.14 - 3.58)</b>               | 1.00                                        | <b>2.58 (2.01 - 3.30)</b>               |
| Perceive a health condition/disability has affected sexual activity/enjoyment, past year |                                             |                                         |                                             |                                         |
| %                                                                                        | 13.5%                                       | 25.9%                                   | 12.8%                                       | 26.1%                                   |
| OR (95% CI)                                                                              | 1.00                                        | <b>2.24 (1.69 - 2.98)</b>               | 1.00                                        | <b>2.39 (1.86 - 3.07)</b>               |
| aAOR (95% CI)                                                                            | 1.00                                        | <b>2.53 (1.89 - 3.40)</b>               | 1.00                                        | <b>2.43 (1.89 - 3.12)</b>               |
| Perceive medications taken have limited sexual activity/ enjoyment, past year            |                                             |                                         |                                             |                                         |
| %                                                                                        | 6.2%                                        | 11.9%                                   | 3.8%                                        | 10.6%                                   |
| OR (95% CI)                                                                              | 1.00                                        | <b>2.04 (1.39 - 3.01)</b>               | 1.00                                        | <b>2.99 (2.08 - 4.29)</b>               |
| aAOR (95% CI)                                                                            | 1.00                                        | <b>2.34 (1.55 - 3.52)</b>               | 1.00                                        | <b>2.97 (2.07 - 4.27)</b>               |
| Taken any medicine/ pills to assist sexual performance, past year                        |                                             |                                         |                                             |                                         |
| %                                                                                        | 6.2%                                        | 6.7%                                    | 0.7%                                        | 2.8%                                    |
| OR (95% CI)                                                                              | 1.00                                        | <b>1.10 (0.66 - 1.81)</b>               | 1.00                                        | <b>4.22 (2.15 - 8.26)</b>               |
| aAOR (95% CI)                                                                            | 1.00                                        | <b>1.17 (0.70 - 1.95)</b>               | 1.00                                        | <b>4.34 (2.21 - 8.51)</b>               |

All participants who have had at least one opposite-sex or same-sex partner, ever (denominators may vary across variables due to item non-response)

aAOR: Age-adjusted odds ratio

<sup>1</sup> All participants who have had at least one opposite-sex or same-sex partner, past year

**Appendix 3: Sexual health service use of those reporting depressive symptoms, by gender**

|                                                                    | Men                                                  |                                               | Women                                                |                                               |
|--------------------------------------------------------------------|------------------------------------------------------|-----------------------------------------------|------------------------------------------------------|-----------------------------------------------|
|                                                                    | Not treated and<br>without<br>depressive<br>symptoms | Depressive<br>symptoms (without<br>treatment) | Not treated and<br>without<br>depressive<br>symptoms | Depressive<br>symptoms (without<br>treatment) |
| <b>Attended a sexual health (GUM) clinic, past year</b>            |                                                      |                                               |                                                      |                                               |
| %                                                                  | 4.2%                                                 | 6.2%                                          | 4.4%                                                 | 8.3%                                          |
| aAOR (95% CI)                                                      | 1.00                                                 | 1.23 (0.81 - 1.88)                            | 1.00                                                 | <b>1.46 (1.04 - 2.06)</b>                     |
| AOR <sup>1</sup> (95% CI)                                          | 1.00                                                 | 1.10 (0.71 - 1.72)                            | 1.00                                                 | 1.36 (0.94 - 1.97)                            |
| <b>Had a chlamydia test, past year<sup>2</sup></b>                 |                                                      |                                               |                                                      |                                               |
| %                                                                  | 15.6%                                                | 19.2%                                         | 25.1%                                                | 32.0%                                         |
| aAOR (95% CI)                                                      | 1.00                                                 | 1.08 (0.74 - 1.57)                            | 1.00                                                 | 1.09 (0.84 - 1.42)                            |
| AOR <sup>1</sup> (95% CI)                                          | 1.00                                                 | 1.00 (0.69 - 1.46)                            | 1.00                                                 | 1.04 (0.78 - 1.37)                            |
| <b>Had a blood test for HIV, past year</b>                         |                                                      |                                               |                                                      |                                               |
| %                                                                  | 3.4%                                                 | 5.9%                                          | 5.3%                                                 | 6.9%                                          |
| aAOR (95% CI)                                                      | 1.00                                                 | <b>1.63 (1.00 - 2.68)</b>                     | 1.00                                                 | 1.06 (0.73 - 1.54)                            |
| AOR <sup>1</sup> (95% CI)                                          | 1.00                                                 | 1.60 (0.96 - 2.67)                            | 1.00                                                 | 1.04 (0.72 - 1.52)                            |
| <b>You or your partner used emergency contraception, past year</b> |                                                      |                                               |                                                      |                                               |
| %                                                                  | 2.3%                                                 | 2.2%                                          | 1.5%                                                 | 2.2%                                          |
| aAOR (95% CI)                                                      | 1.00                                                 | 0.79 (0.44 - 1.40)                            | 1.00                                                 | 1.04 (0.60 - 1.78)                            |
| AOR <sup>1</sup> (95% CI)                                          | 1.00                                                 | 0.75 (0.42 - 1.34)                            | 1.00                                                 | 0.85 (0.47 - 1.54)                            |
| <b>Sought professional help regarding your sex life, past year</b> |                                                      |                                               |                                                      |                                               |
| %                                                                  | 6.4%                                                 | 8.9%                                          | 5.7%                                                 | 9.4%                                          |
| aAOR (95% CI)                                                      | 1.00                                                 | 1.44 (0.93 - 2.23)                            | 1.00                                                 | <b>1.70 (1.20 - 2.41)</b>                     |
| AOR <sup>1</sup> (95% CI)                                          | 1.00                                                 | 1.51 (0.97 - 2.35)                            | 1.00                                                 | <b>1.65 (1.16 - 2.34)</b>                     |
| Unweighted, weighted                                               | 4809, 5981                                           | 405, 455                                      | 6413, 5718                                           | 549, 449                                      |

All participants who have had at least one opposite-sex or same-sex partner, ever (denominators may vary across variables due to item non-response)

aAOR: Age-adjusted odds ratio

<sup>1</sup> Adjusted for age and 2+ partners without using a condom, past year

<sup>2</sup> Participants aged 16-44 years
